# Supplementary material
Source: Springer Nature journal article supplement (https://www.springermedizin.de/resource/supplementary/12871_2014_254_MOESM2_ESM.pdf/9429246)

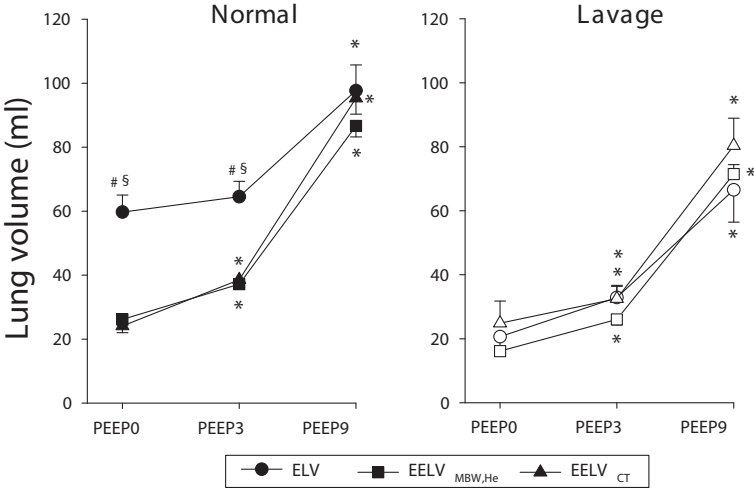

Supplement: MOESM2 [file 9429246]
